# Supplementary material for: Porous protein–silica composite formation: manipulation of silicate porosity and protein conformation
Source: Royal Society of Chemistry journal article supplement (doi:10.1039/c1sm05299c), 2011-01-01
Supplement: c1sm05299c.pdf [file c1sm05299c.pdf]

# POROUS PROTEIN/SILICA COMPOSITE FORMATION: MANIPULATION OF SILICATE POROSITY AND PROTEIN CONFORMATION

Agathe C. Fournier and Kathryn M. McGrath\*

MacDiarmid Institute for Advanced Materials and Nanotechnology, School of  
Chemical and Physical Sciences, Victoria University of Wellington, Wellington,  
New Zealand

\*Corresponding author: [kathryn.mcgrath@vuw.ac.nz](mailto:kathryn.mcgrath@vuw.ac.nz)

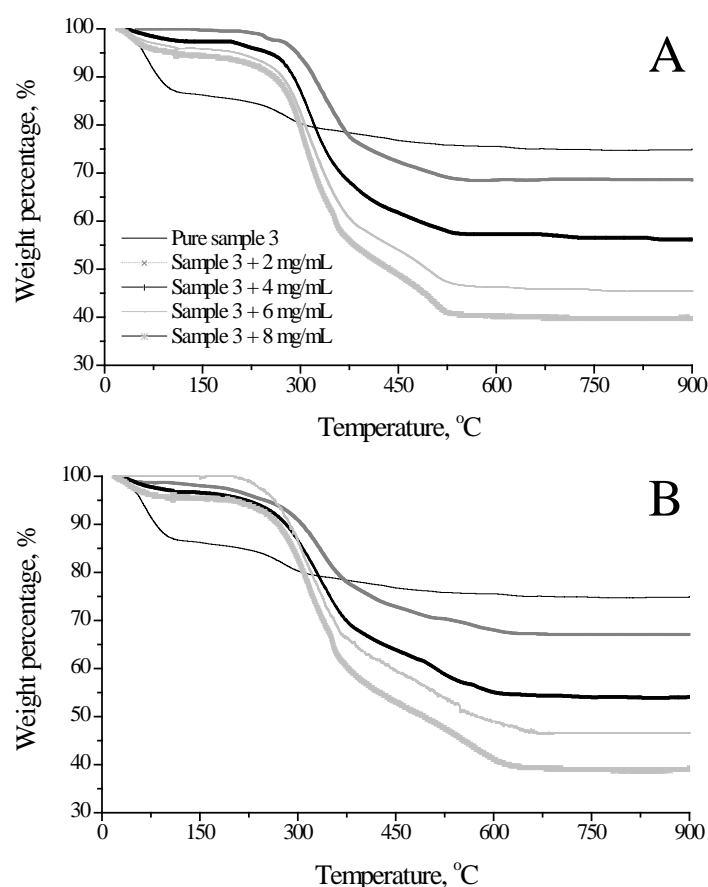

**ESI Fig. 1.** Comparison of weight loss from the (A) BSA- and (B) lysozyme-silica mesoporous composites, synthesized using sample 3 and different protein concentrations.
